# Supplementary material
Source: PubMed Central journal article supplement (PMC3123070)

## Supplemental Material

### **TIN2 DYSKERATOSIS CONGENITAL MISSENSE MUTANTS ARE DEFECTIVE IN ASSOCIATION WITH TELOMERASE**

Dong Yang<sup>2</sup>, Quanyuan He<sup>2</sup>, Hyeung Kim<sup>2</sup>, Wenbin Ma<sup>1,2\*</sup>, Zhou Songyang<sup>1,2\*</sup>

Running title: TIN2 DC mutants and telomerase association

From <sup>1</sup>State Key laboratory for Biocontrol, Sun Yat-Sen University, Guangzhou, P. R. China; <sup>2</sup>Verna and Mars Mclean Department of Biochemistry and Molecular Biology, Baylor College of Medicine, One Baylor Plaza, Houston, TX 77030

\* To whom correspondence may be addressed: Verna and Marrs McLean Dept. of Biochemistry and Molecular Biology, Baylor College of Medicine, Zhou Songyang, One Baylor Plaza, Houston, TX 77030. Tel.: 713-798-3486; Fax: 713-796-9438; E-mail: songyang@bcm.edu or wma@bcm.edu

**Supplementary Figure S1. TIN2 mutations in DC.** *A.* Summary table of TIN2 mutations found in DC patients (1-3). *B.* Sequence conservation across mammalian species in the region of TIN2 frequently mutated in DC patients. The alignment was generated using Jalview (4) and conserved residues are shaded in blue. Arrows indicate residues targeted for mutations.

**Supplementary Figure S2. Cell cycle and protein expression analysis of HTC75 cells expressing various TIN2 proteins.** *A.* Cycling HTC75 cells expressing indicated TIN2 proteins were harvested, stained with PI, and analyzed by flow cytometry. *B.* Quantification of the relative protein level from Figure 3*A*. The results were normalized to the expression amount of TIN2-FLAG and Actin.

**Supplementary Figure S3. DC mutations in TIN2 have minimal impact on its interaction with TPP1 and TRF1.** Myc-tagged wild-type (WT) or mutant TIN2 were transiently co-expressed into 293T cells with FLAG-tagged TPP1 (*A*) or TRF1 (*B*). FLAG-tagged TPP1- $\Delta$ C22 served as a negative control. FLAG fusion proteins were immunoprecipitated with anti-FLAG beads, and the precipitated proteins were detected by western blotting (WB).

**Supplementary Figure S4. TIN2 mutants that were expressed at endogenous levels did not alter TIN2-TPP1 interaction.** *A.* Empty vector or TIN2 shRNA (shTIN2) was stably introduced into HT1080 cells. The shTIN2 cells were then used to establish stable cells that also expressed doxycycline (Dox) inducible RNAi-resistant SFB-tagged wild-type or mutant TIN2. Whole-cell extracts from these cells were blotted with the indicated antibodies. *B.* Anti-FLAG immunoprecipitates from cells shown in (*A*) were eluted with 3xFLAG peptides for quantitative immunoblotting. TIN2 protein mixtures were serially diluted to obtain a calibration curve in order to normalize the protein amount in each IP. The ratio of TPP1/SFB-TIN2 was also calculated for each IP.

**Supplementary Figure S5. DC mutations in TIN2 led to reduced association with TERT.** TAP-TERT and TPP1-FLAG were transiently co-transfected with GST alone, or GST-tagged wild-type or mutant TIN2 into 293T cells. *A.* Whole cell extracts (input) were analyzed by western blotting (WB). *B.* The GST fusion proteins were pulled down with glutathione beads and examined by western blotting. The mixture of precipitated proteins was serially diluted to obtain a calibration curve in order to normalize the protein amount in each pull-down assay. PAP, peroxidase-anti-peroxidase, was used to blot for protein A on the TAP-tag. *C.* Quantification of the relative amount of precipitated proteins in (*B*). The amount of TPP1-FLAG and TAP-TERT was normalized to GST-TIN2 level in the corresponding pull-down.

**Supplementary Figure S6. TIN2 associates with less telomerase activity upon knockdown of TPP1.** shRNAs against GFP or TPP1 were introduced into cells stably expressing Dox-inducible SFB-tagged TIN2. These cells were then treated with Dox, followed by immunoprecipitation with anti-FLAG antibodies. The immunoprecipitates were eluted with 3xFLAG peptides and used in western blotting (A) or Q-TRAP for telomerase activity (B) as described above. TIN2 protein mixtures were serially diluted to obtain a calibration curve in order to normalize the protein amount in each IP. The results were normalized based on the TIN2 protein amount calculated in (A). Error bars represent standard error from triplicates of each experiment. *p*-values were calculated using the Student *t*-test. \* indicates *p*<0.05.

1. Walne, A. J., Vulliamy, T. J., Beswick, R., Kirwan, M., and Dokal, I. (2008) *Blood*, 3594-3600
2. Savage, S. A., Giri, N., Baerlocher, G. M., Orr, N., Lansdorp, P. M., and Alter, B. P. (2008) *Am J Hum Genet* **82**, 501-509
3. Sasa, G., Ribes-Zamora, A., Nelson, N., and Bertuch, A. (2011) *Clin Genet*
4. Waterhouse, A. M., Procter, J. B., Martin, D. M., Clamp, M., and Barton, G. J. (2009) *Bioinformatics* **25**, 1189-1191

A

| TIN2 mutations | Reported cases | TIN2 mutations | Reported cases |
|----------------|----------------|----------------|----------------|
| Q269X          | 1              | P283H          | 1              |
| Q271X          | 1              | P283S          | 1              |
| K280RfsX36     | 1              | T284A          | 1              |
| K280X          | 1              | T284HfsX8      | 1              |
| K280E          | 6              | L287P          | 1              |
| R282C          | 7              | P289S          | 1              |
| R282H          | 15             | F290LfsX2      | 1              |
| R282S          | 1              | R291G          | 1              |
| P283A          | 1              | Q298RfsX19     | 1              |
| <b>Total</b>   | <b>43</b>      |                |                |

B

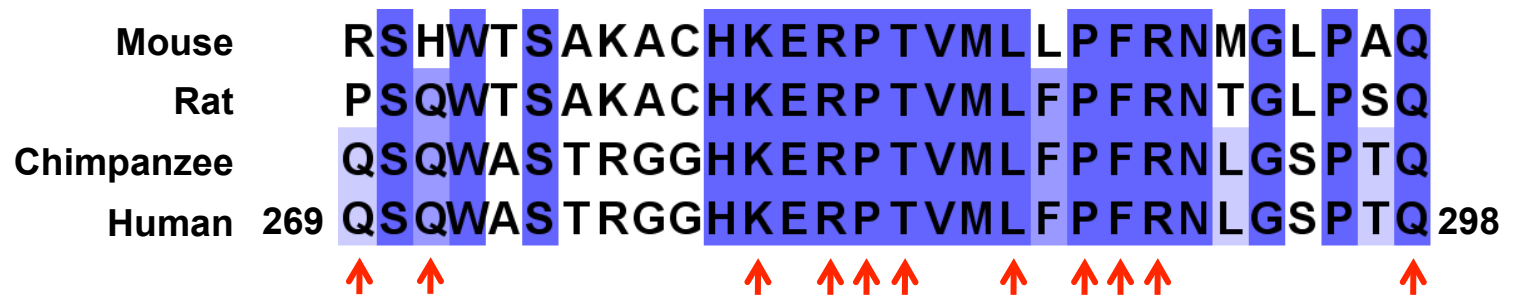

**A**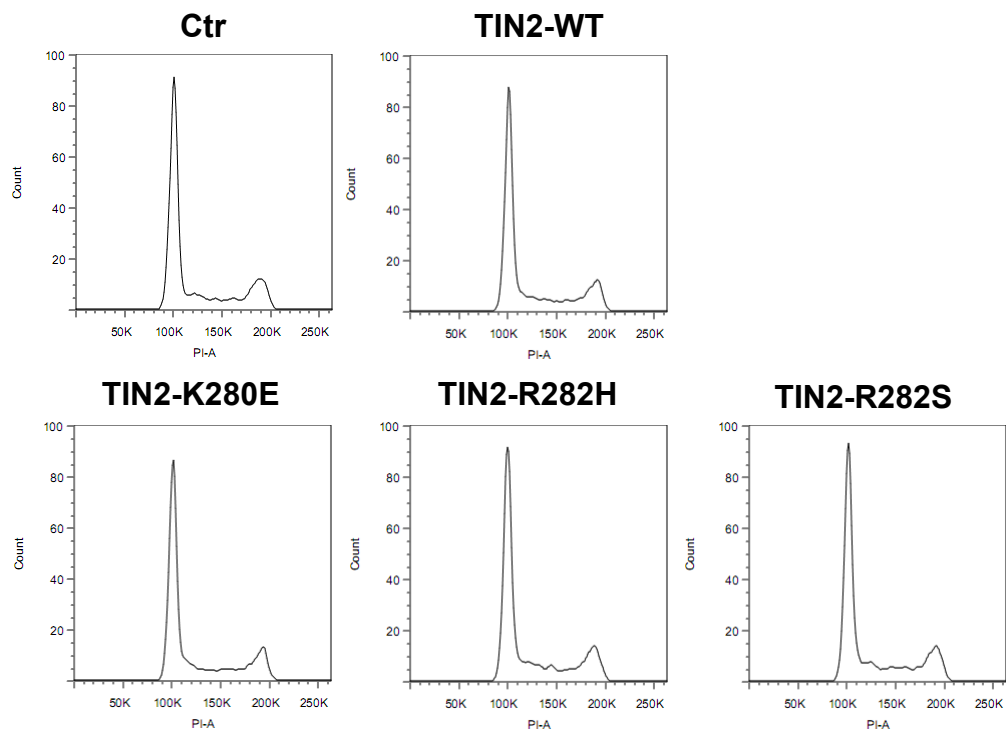**B**

| <b>Relative Protein Levels (PD65)</b> |                |                   |                   |                   |
|---------------------------------------|----------------|-------------------|-------------------|-------------------|
| <b>Cell line</b>                      | <b>TIN2-WT</b> | <b>TIN2-K280E</b> | <b>TIN2-R282H</b> | <b>TIN2-R282S</b> |
| TRF1                                  | 1              | 1.05              | 1.05              | 1.19              |
| TRF2                                  | 1              | 1.05              | 1.15              | 0.93              |
| TPP1                                  | 1              | 1.09              | 1.06              | 1.08              |
| RAP1                                  | 1              | 1.35              | 1.10              | 0.95              |

**A**

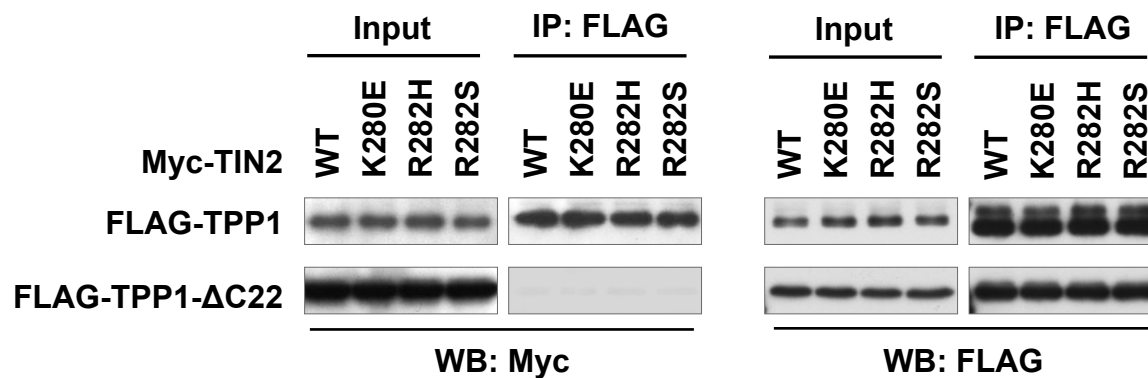

**B**

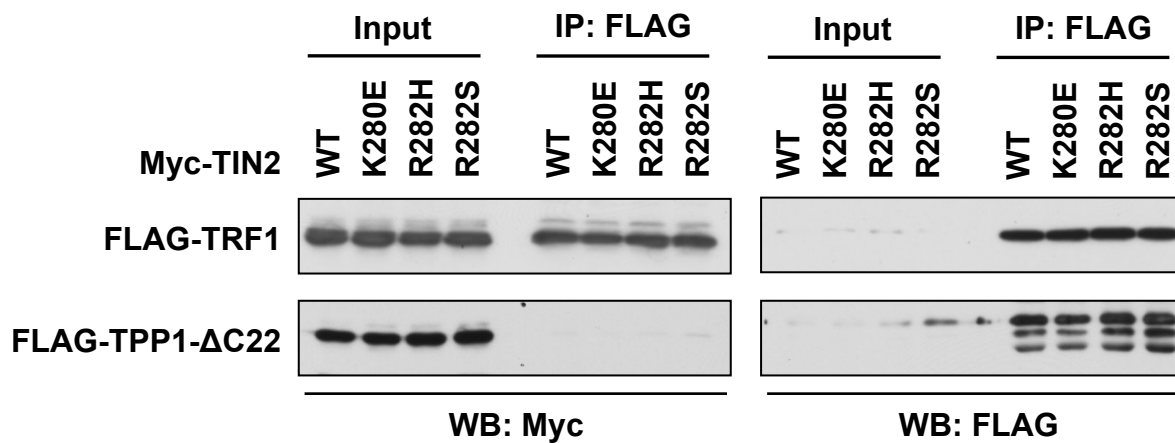

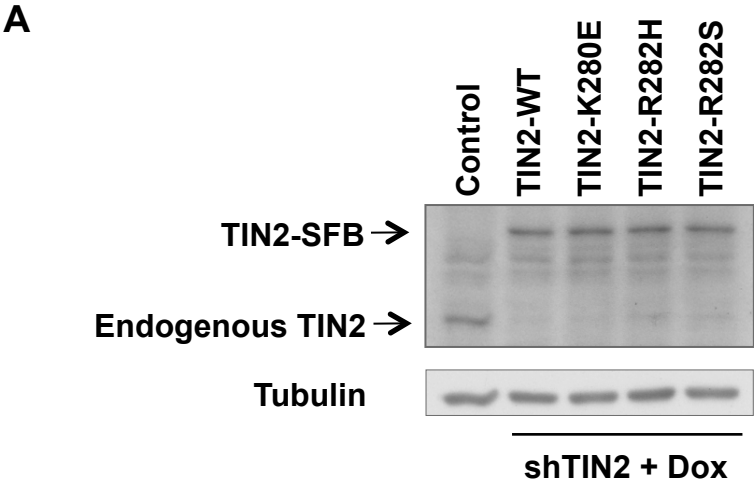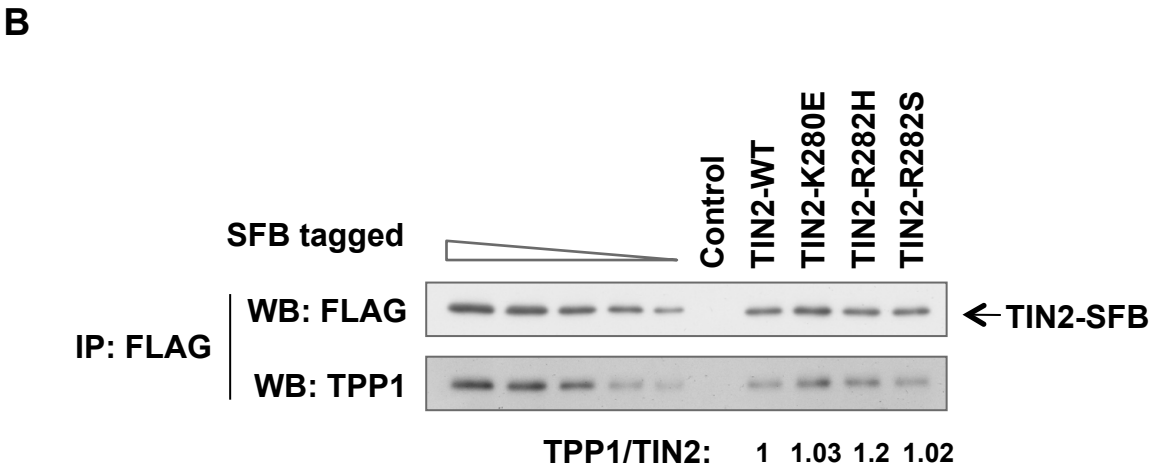

**A**

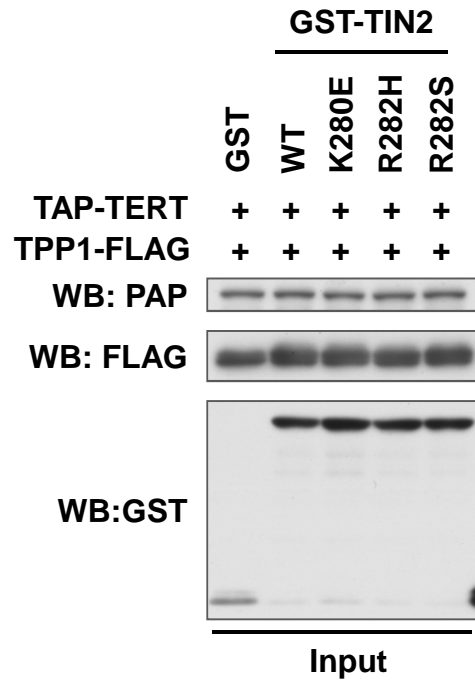

**C**

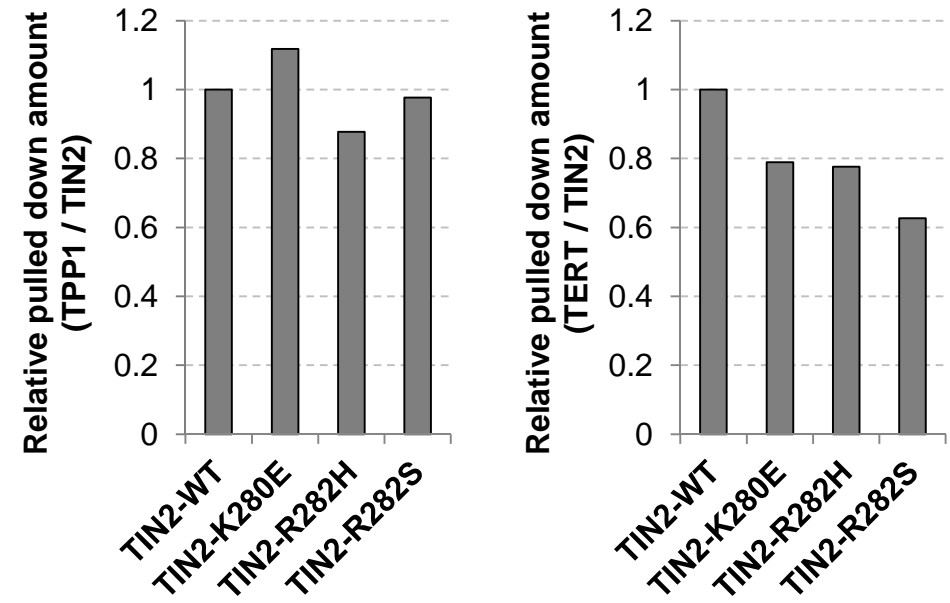

**B**

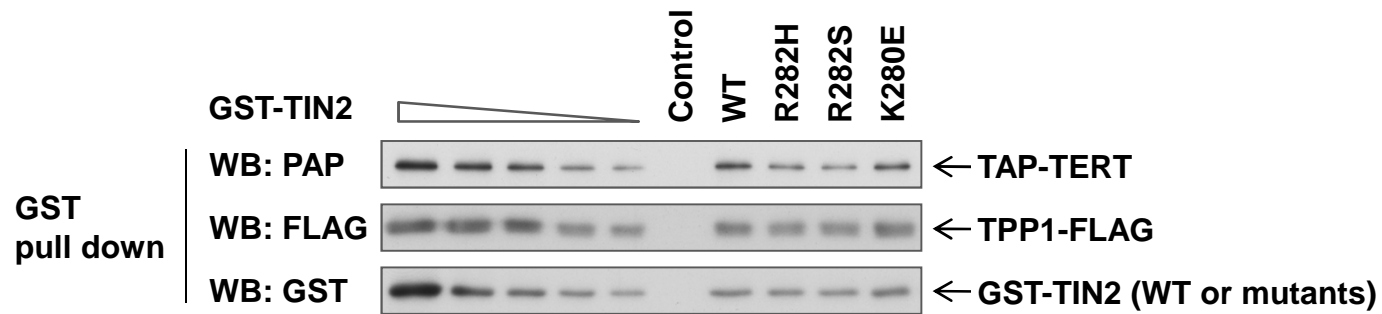

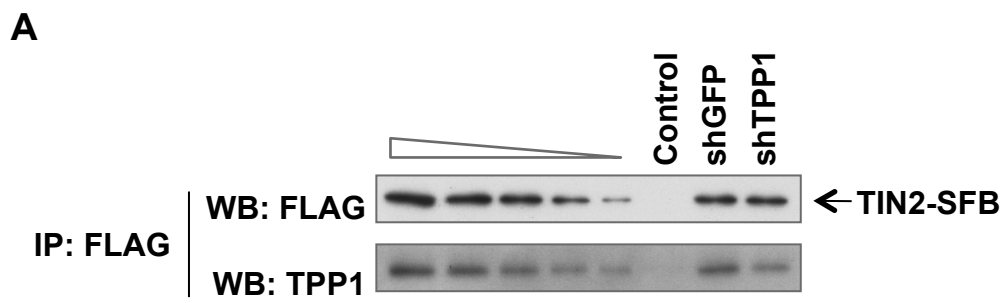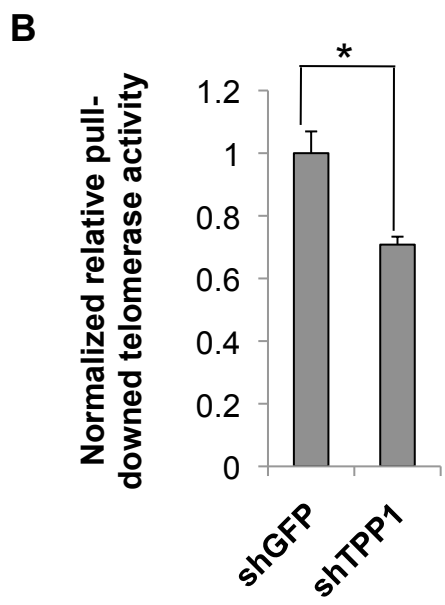

Supplement: supp_M111.225870_Sufigs.pdf [file supp_M111.225870_Sufigs.pdf]
